# Supplementary material
Source: MDPI journal article supplement (https://www.mdpi.com/2076-3417/14/7/3120)

## SUPPLEMENTARY MATERIAL

**Figure S1.** Nucleation temperatures can be seen at the dip of each measurement area on the y-axis with respective time of nucleation on the x-axis. Measurements of average temperature at the top and bottom of each cuvette R6 to R15 and R16 were used to generate the plot.

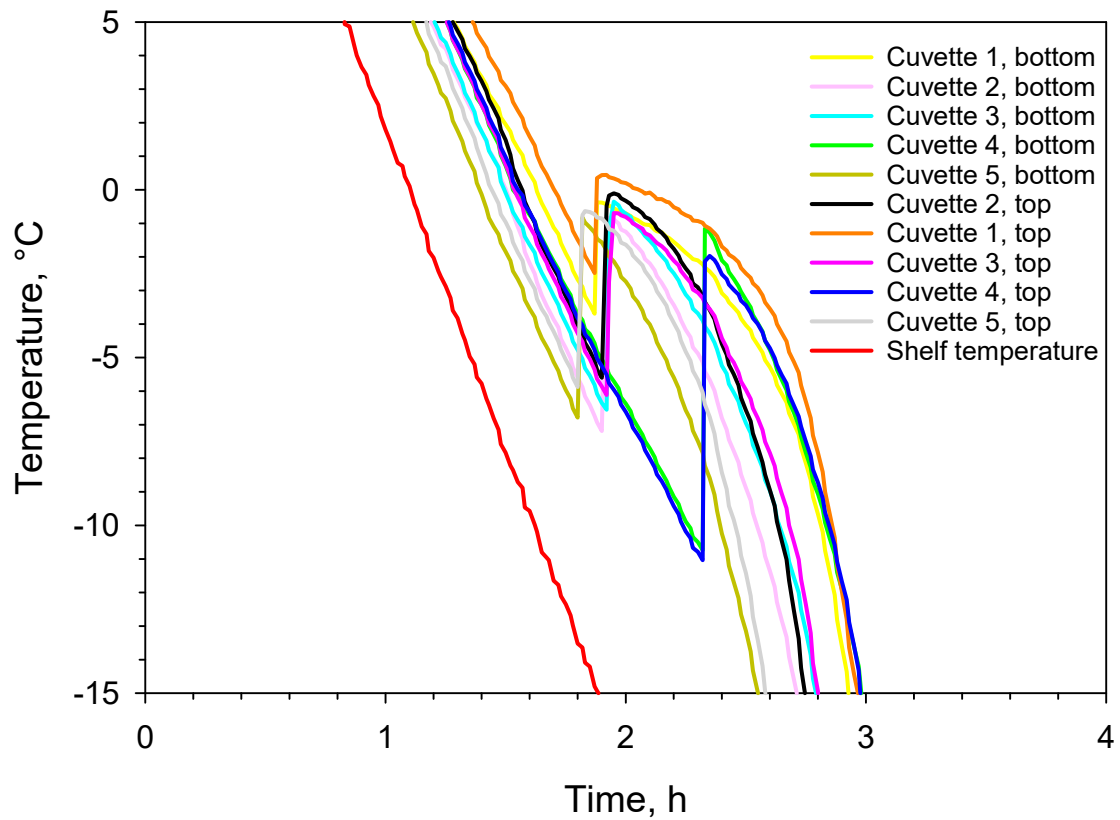

**Figure S2.** Entire freeze-drying process; top and bottom view of cuvettes with and without probes using average temperature readouts from R6 to R15 and R16.

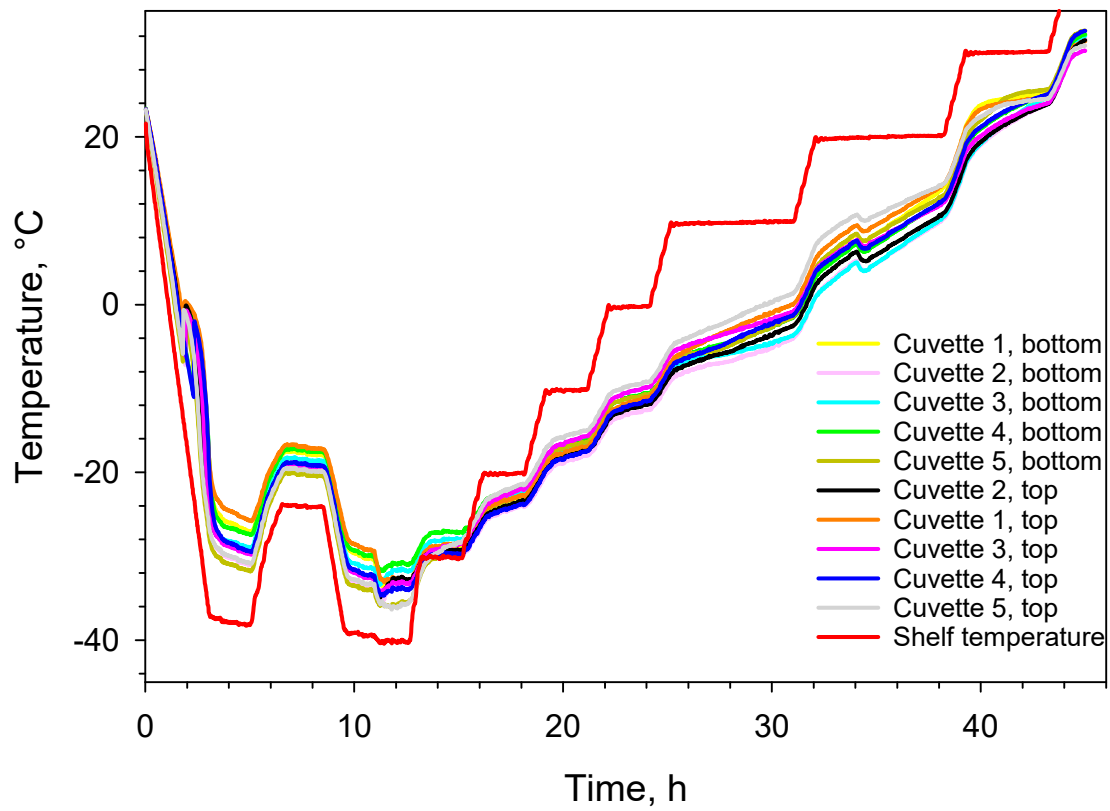

**Figure S3.** Primary drying process, top and bottom view of cuvettes 1 to 5 with and without probes using average temperature readouts from R6 to R15 and R16.

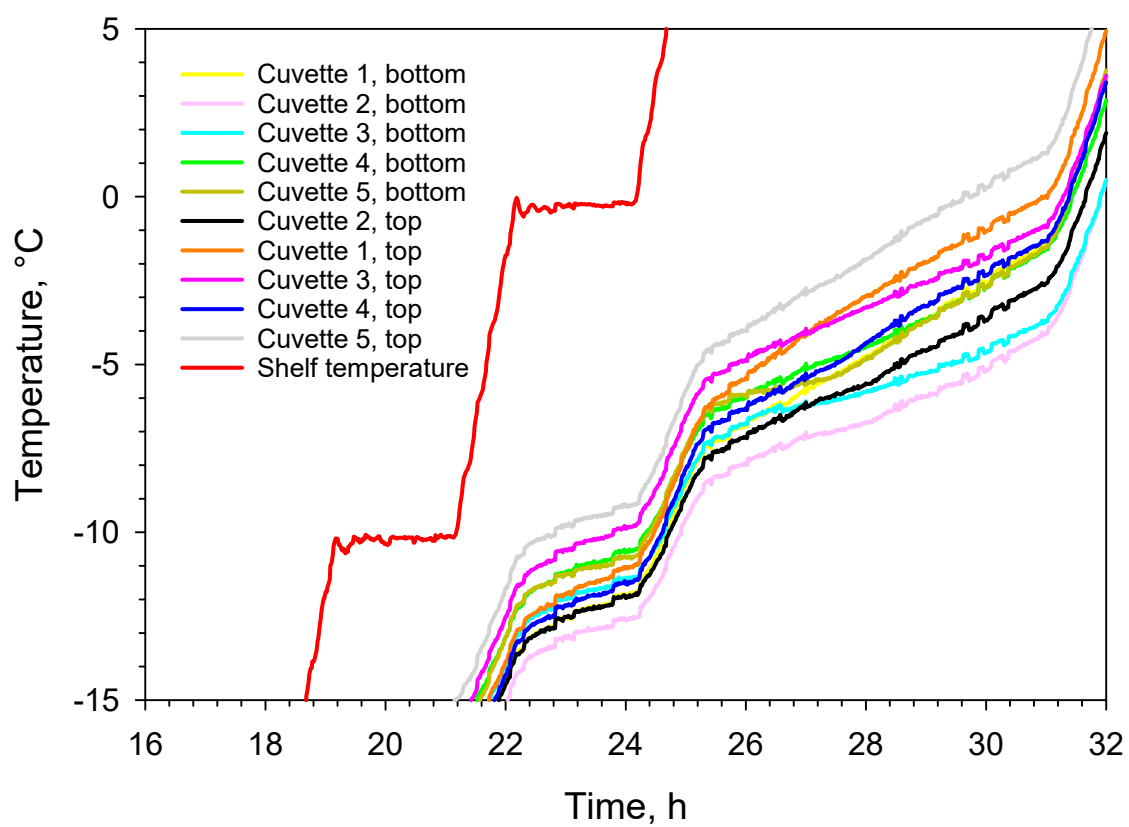

**Figure S4.** Selection showing primary drying process. Surface, top and bottom view of cuvettes 1 and 2 with and without a probe using average temperature readouts from R1, R2, R6 , R7, R11, R12 and R16.

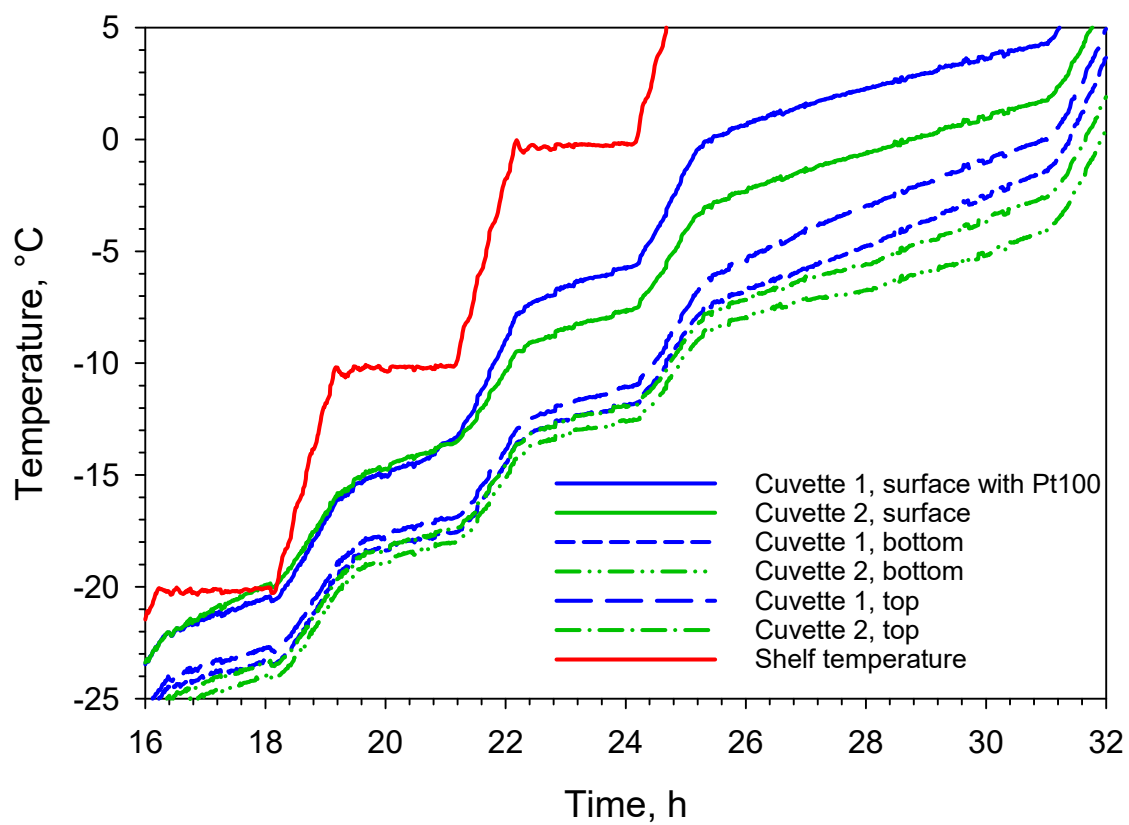

**Figure S5.** Thermogram of cuvettes 1 to 5 with profiles L1 to L5 at the surface and L6 along the depth profile after 2700 minutes, 45 h

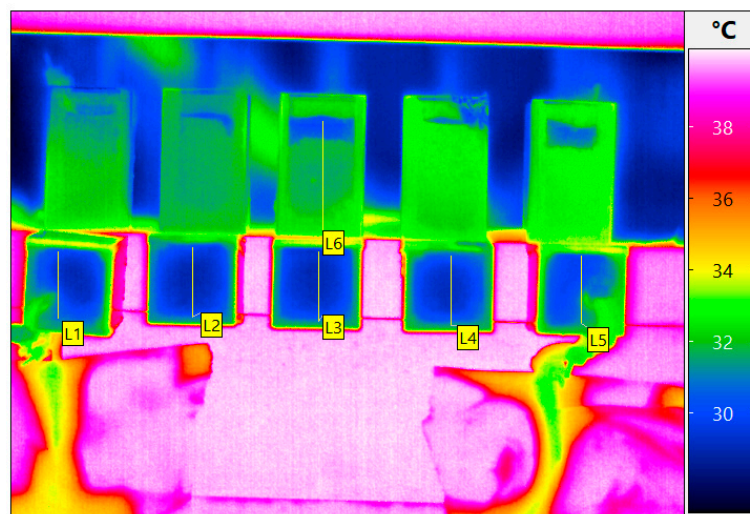

**Figure S6.** Temperature readout of lines 1-6 as a function of cuvette at the surface and depth (for line 6) after 2700 minutes (45 h)

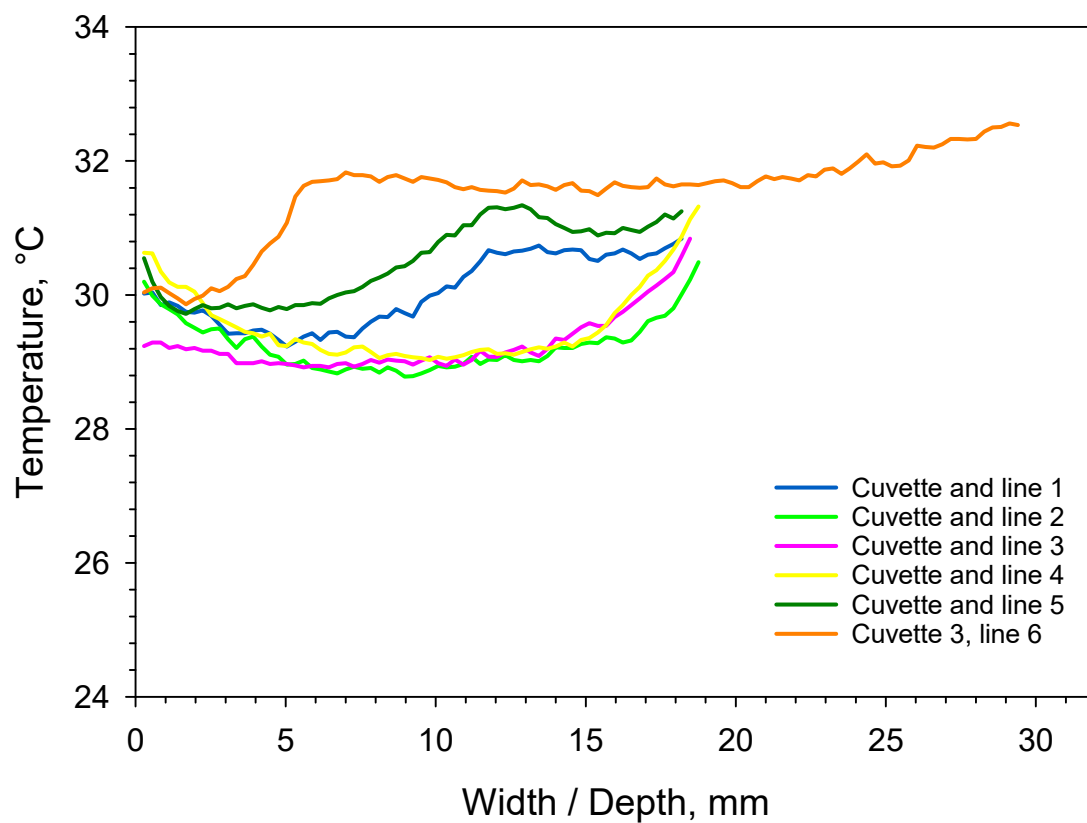

Supplement: s1 [file s1]
